# Supplementary material for: Molecularly engineered electroplex emission for an efficient near-infrared light-emitting electrochemical cell (NIR-LEC)
Source: Royal Society of Chemistry journal article supplement (doi:10.1039/c9ra10761d), 2020-01-01
Supplement: c9ra10761d1.pdf [file c9ra10761d1.pdf]

## Supplementary information

### ESI. S1. Synthesis of complexes

The compounds  $\text{cis-}[\text{Ru}(\text{dmbpy})_2\text{Cl}_2]\cdot 2\text{H}_2\text{O}$ ,  $\text{cis-}[\text{Ru}(\text{bpy})_2\text{Cl}_2]\cdot 2\text{H}_2\text{O}$ ,  $\text{cis}[\text{Ru}(\text{phen})_2\text{Cl}_2]\cdot 2\text{H}_2\text{O}$  were synthesized according to literature methods [1].

**Synthesis of  $[\text{Ru}(\text{bpy})_2(\text{DPCO})](\text{ClO}_4)=[\text{Ru}(\text{LH4})]$ .** 1 mmol of  $[\text{Ru}(\text{bpy})_2\text{Cl}_2]$  and 1 mmol of DPC ligand was solved in 5 mL of DMF and heated at 120 °C for 10h. To facilitate deprotonation of DPC to produce DPCO, 0.2 mL of  $\text{NEt}_3$  was also added to mixture. After that, the solution was treated with saturated aqueous solution of  $\text{NaClO}_4$  and gave a dark violet precipitate and washed several times with water to remove traces of salts. The crude product was purified by column chromatography on alumina with  $\text{CH}_3\text{CN}$ -toluene (1/1, v/v) as an eluent. The mainly violet band was collected. The solvent was removed under reduced pressure and crystals were obtained. CHN analysis, Calculated (%): C, 52.633; H, 3.754; N, 14.882. Found (%): C, 52.626; H, 3.761; N, 14.877.  $^1\text{HNMR}$  (400 MHz,  $\text{D}_6$ -DMSO): 9.55 (s, 1H), 8.78 (d, 4H), 8.59 (d, 4H), 7.57 (t, 4H), 7.36 (t, 2H), 7.23-7.25 (m, 4H), 7.06-7.15 (m, 7H), 6.81 (t, 1H). ESI-MS Cal. ESI-MS Cal. for  $[\text{C}_{33}\text{H}_{28}\text{N}_8\text{ORu}]^+$  653.85, found 653.78.

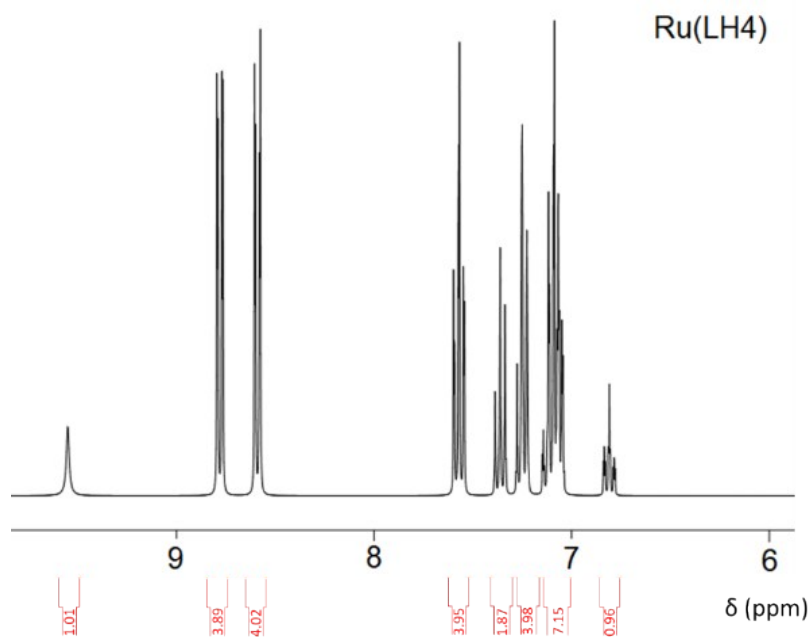

ESI. Fig. S1. Aromatic region of  $^1\text{HNMR}$  of  $[\text{Ru}(\text{LH4})]$  in  $\text{DMSO-d}_6$  solvent at room temperature.

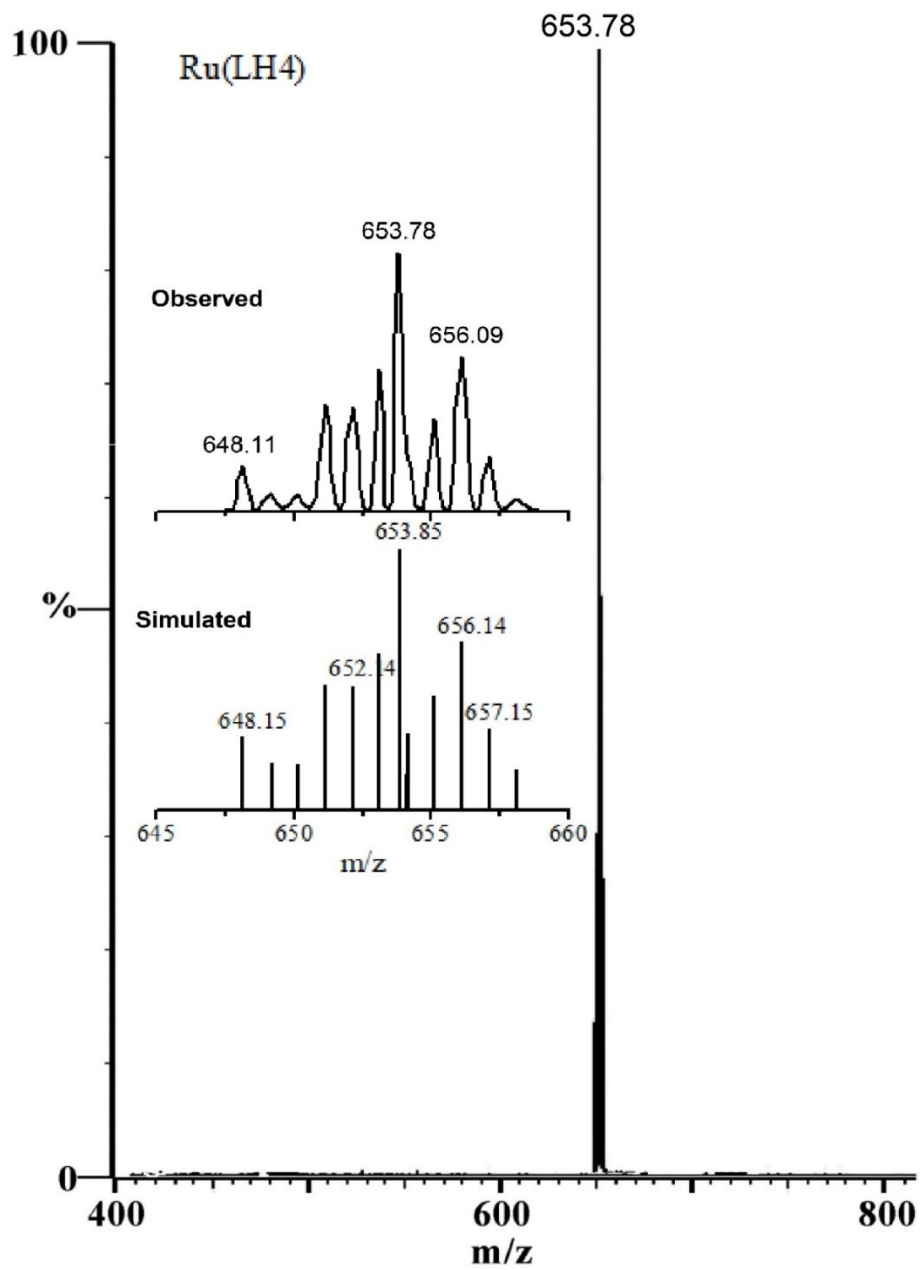

ESI. Fig. S2. ESI-MS spectra of [Ru(LH4)].

**Synthesis of [Ru(phen)<sub>2</sub>(DPCO)](ClO<sub>4</sub>)=[Ru(LH5)].** The procedure for synthesis of Ru(LH5) is similar to Ru(LH4) except that for preparation of precursor, 2,2-bipyridine ligand was replaced by 1,10-phenanthroline. CHN analysis, Calculated (%): C, 55.54; H, 3.40; N, 14.00. Found (%): C, 55.536; H, 3.39; N, 14.01. <sup>1</sup>HNMR (400 MHz, D<sub>6</sub>-DMSO): 9.55 (s, 1H), 8.88 (d, 4H), 8.55 (d, 4H), 7.98 (s, 4H), 7.63 (t, 4H), 7.36 (t, 2H), 7.22-7.25 (m, 4H), 7.06-7.12 (m, 3H), 6.83 (t, 1H). ESI-MS Cal. for [C<sub>37</sub>H<sub>28</sub>N<sub>8</sub>ORu]<sup>+</sup> 701.80, found.701.75.

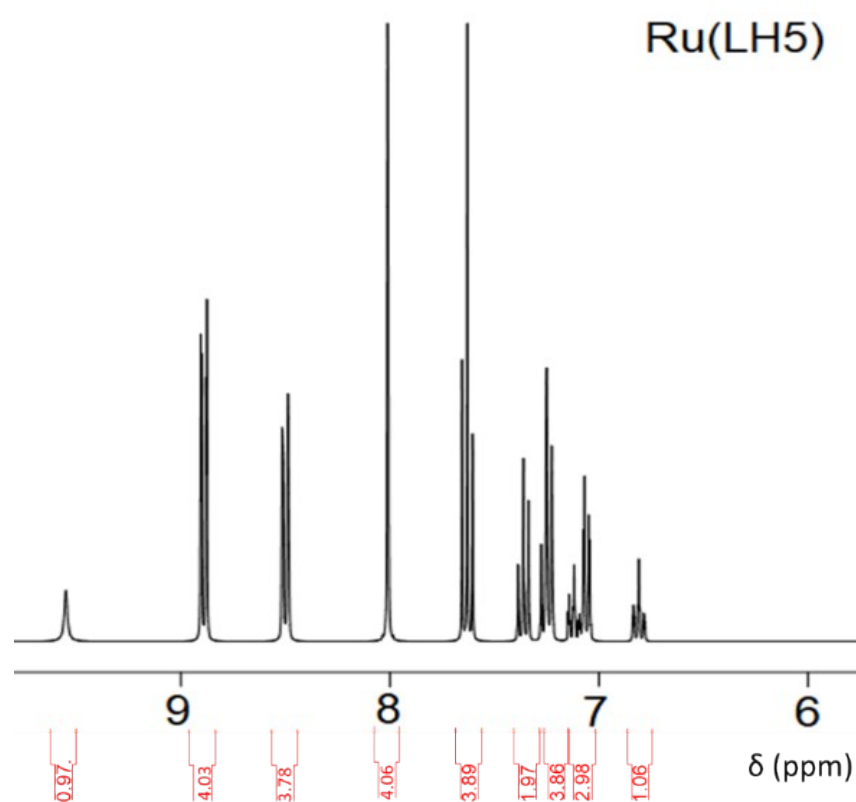

**ESI. Fig. S3.** Aromatic region of <sup>1</sup>H NMR of [Ru(LH5)] in DMSO-d<sub>6</sub> solvent at room temperature.

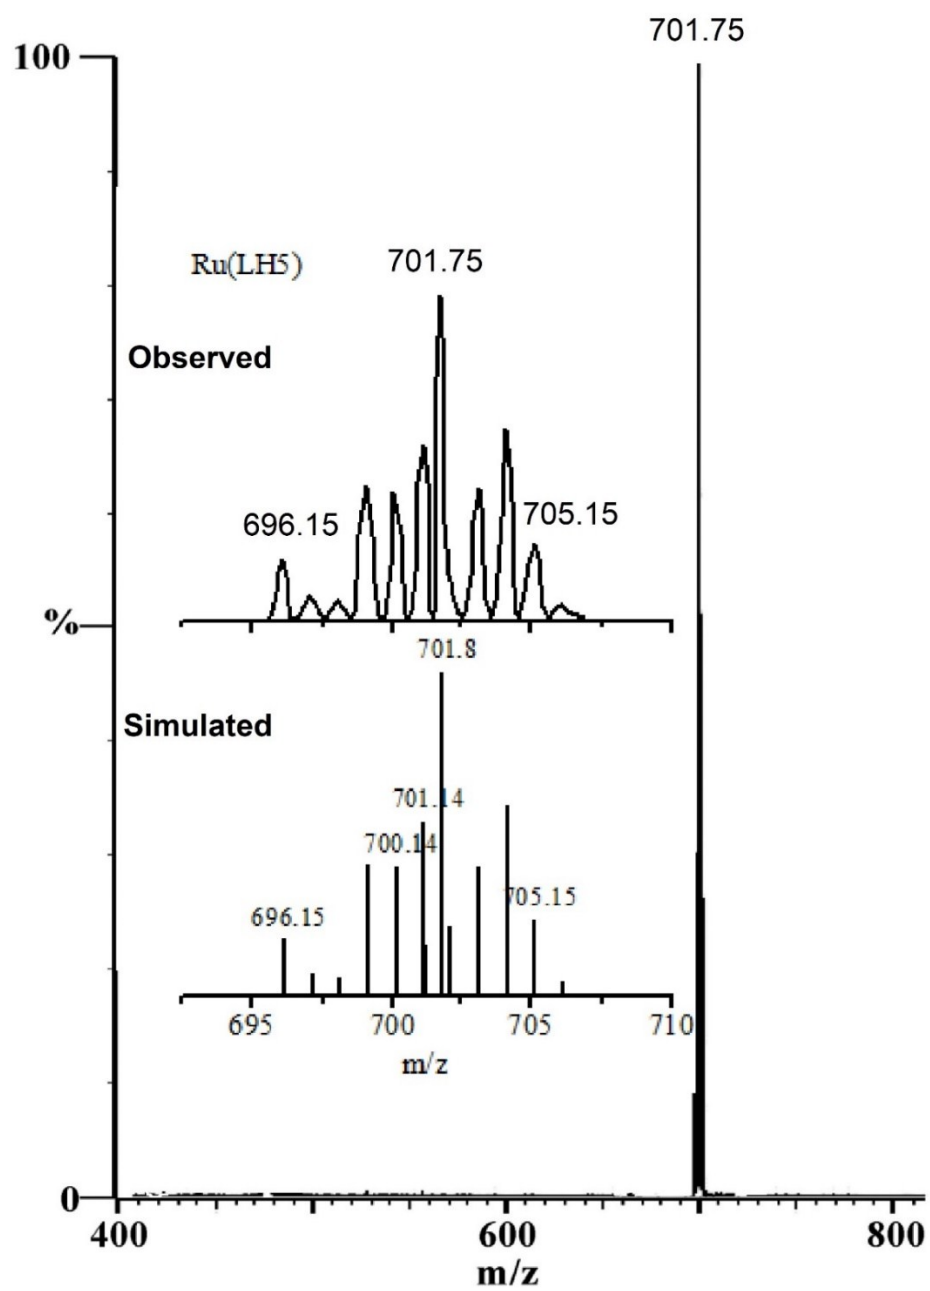

ESI. Fig. S4. ESI-MS of [Ru(LH5)].

**Synthesis of [Ru(dmbpy)<sub>2</sub>(DPCO)]=[Ru(LH6)]. Ru(LH6)** was synthesized by same procedure for Ru(LH4) except that the 2,2-bipyridine was replaced by 4,4 dimethyl-2,2 bipyridine. CHN analysis, Calculated (%): C, 54.98; H, 4.36; N, 13.86. Found (%):C, 54.92; H, 4.35; N, 13.84. <sup>1</sup>HNMR (400 MHz, D<sub>6</sub>-DMSO): 9.56 (s, 1H), 8.80 (s, 4H), 8.60 (d, 4H), 7.63 (t, 2H), 7.50 (t, 2H), 7.33 (t, 1H), 7.19-7.25 (m, 6H), 7.02 (d, 2H), 6.79 (t, 1H), 2.43 (CH<sub>3</sub> of dmbpy, overlap with solvent peak). ESI-MS Cal. for [C<sub>37</sub>H<sub>36</sub>N<sub>8</sub>ORu]<sup>+</sup> 709.35, found 709.29.

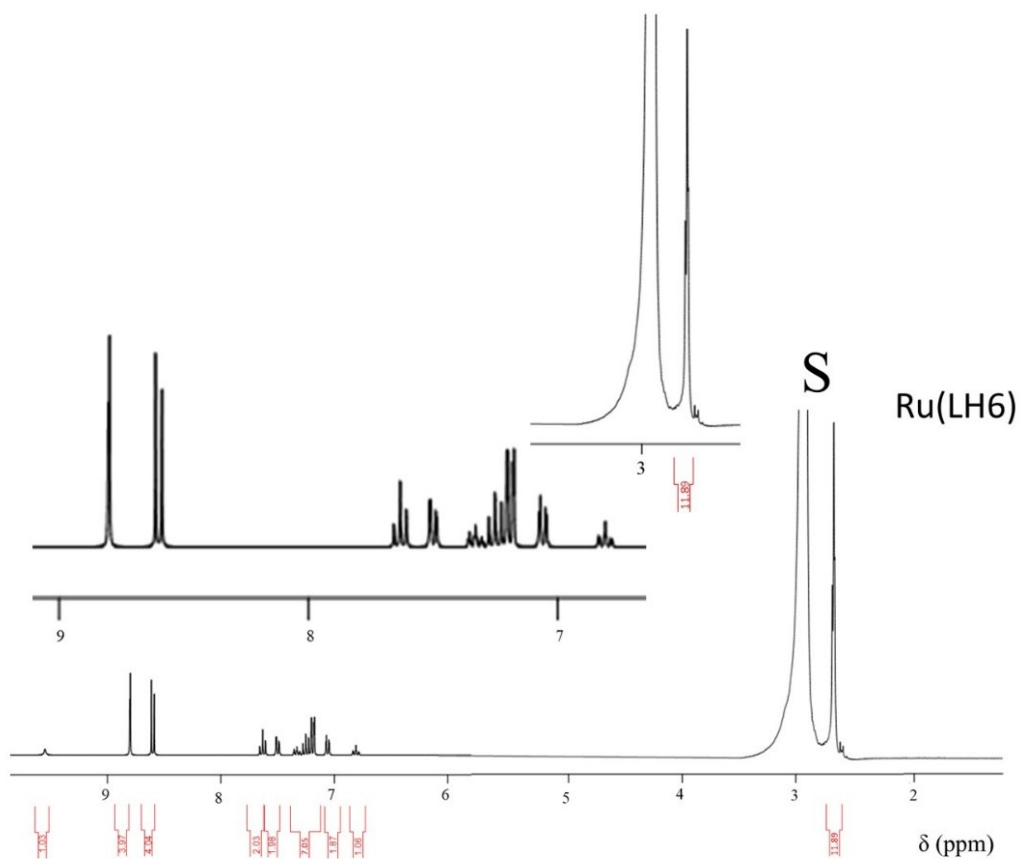

**ESI. Fig. S5.** <sup>1</sup>HNMR of [Ru(LH6)] in DMSO-d<sub>6</sub> solvent at room temperature.

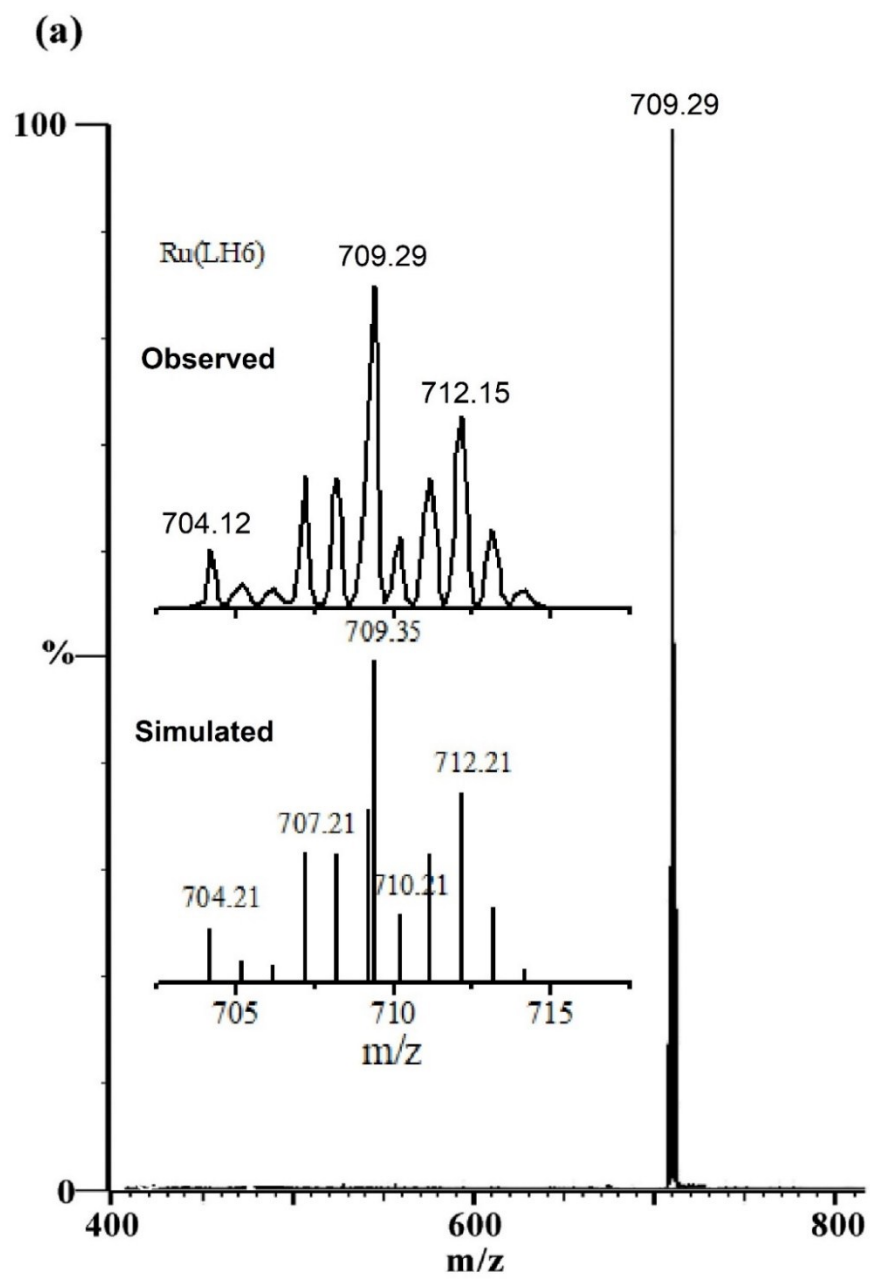

ESI. Fig. S6. ESI-MS of [Ru(LH6)].

## S2. Equipment

All materials and solvents were purchased from Sigma-Aldrich and Merck without any further purification. Elemental analyses of carbon, hydrogen, and nitrogen were carried out with an Elementar Vario CHN analyzer. IR spectroscopy studies were performed on a FT-IR spectrophotometer in the 400- 4000  $\text{cm}^{-1}$  region (w, weak; b, broad; m, medium; s, strong).  $^1\text{H}$  NMR spectra is recorded on a Bruker 250 MHz spectrometer (s, singlet; d, doublet; t, triplet; m, multiplet; dd, double doublet). Analyses were performed. UV-vis absorption spectra in methanol solution were recorded on a 160 Shimadzu UV-vis spectrophotometer. Electroluminescence (EL) emissions spectra were recorded with an ocean optic USB2000 spectrophotometer. Electrochemical measurements were employed in a SAMA500 electro analyzer using  $10^{-3}$   $\text{molL}^{-1}$  solution of  $\text{CH}_3\text{CN}$  at a various scan rate. The electrolytic cell consists of platinum disc as the working electrode, a platinum wire as the counter electrode, and  $\text{Ag}/\text{AgCl}$  as the reference electrode. The supporting electrolyte was  $0.1$   $\text{mol.L}^{-1}$  tetrabutylammonium perchlorate (TBAP) in  $\text{CH}_3\text{CN}$  solutions.

Photoluminescence (PL) spectra of complexes in degassed solutions at 298 K and neat films were recorded using Varian-Cary Eclipse fluorescence spectrophotometer and AvaSpec-125 spectrophotometer, respectively. The PLQY (PL quantum yields) were calculated against  $[\text{Ru}(\text{bpy})_3]^{2+}$  in degassed acetonitrile solution at 298 K as a standard ( $\Phi_{std} = 9.55\%$  [2]) using the following equation:

$$\Phi_{unk} = \Phi_{std} \cdot \left( \frac{I_{unk}/A_{unk}}{I_{std}/A_{std}} \right) \cdot \left( \frac{\eta_{unk}}{\eta_{std}} \right)^2$$

In this equation,  $\Phi_{unk}$  is phosphorescence quantum yields of complexes,  $I_{unk}$  and  $I_{std}$  are the integrated areas of the corrected PL spectra and standard, respectively,  $A_{unk}$  and  $A_{std}$  are the absorbances of the ruthenium complexes and the standard at the excitation wavelength ( $\lambda_{exc} = 460$  nm), and  $\eta_{unk}$  and  $\eta_{std}$  are the indexes of refraction of the respective solvents (taken to be equal to the neat solvents in both cases).

## S3. Fabrication and measurements of LEC devices

Indium tin oxide (ITO) coated glass with a sheet resistance of 15-18  $\Omega/$  was used as anode. After being sufficiently cleaned with isopropanol, ethanol and deionized water, it was dried in the oven at 90  $^{\circ}\text{C}$  for 4 h. The devices were prepared by spin-coating a thin layer of each complexes from a 4% (w/v) acetonitrile solution at room temperature, on top of an ITO glass substrate. All solution and film preparation were carried out under ambient conditions. The thicknesses of the films were

~ 85 nm, measured with profilometry. After spin coating, the thin films were baked at 75 °C in inert atmosphere for 12 hours to remove the solvent residue (acetonitrile). A Ga: In (75.5:24.5 wt %, mp 15.7 °C) eutectic cathode (ca. 3.5 mm diameter) was printed on the films at room temperature by using a special syringe and then connected via a thin copper wire inserted into the Ga:In contact. Finally, it was sealed with epoxy cement. All EL measurement was carried out in air atmosphere. The electrical and emission characteristics of LEC devices were measured using a SAMA500 electroanalyzer system and an AvaSpec-125 spectrophotometer and a Photo Research PR-650 spectroradiometer.

Density functional theory (DFT) calculations were performed on the optimized structures in order to simulate the absorption spectra, using the B3LYP exchange-correlation functional within the Amsterdam density functional program package (ADF2014).

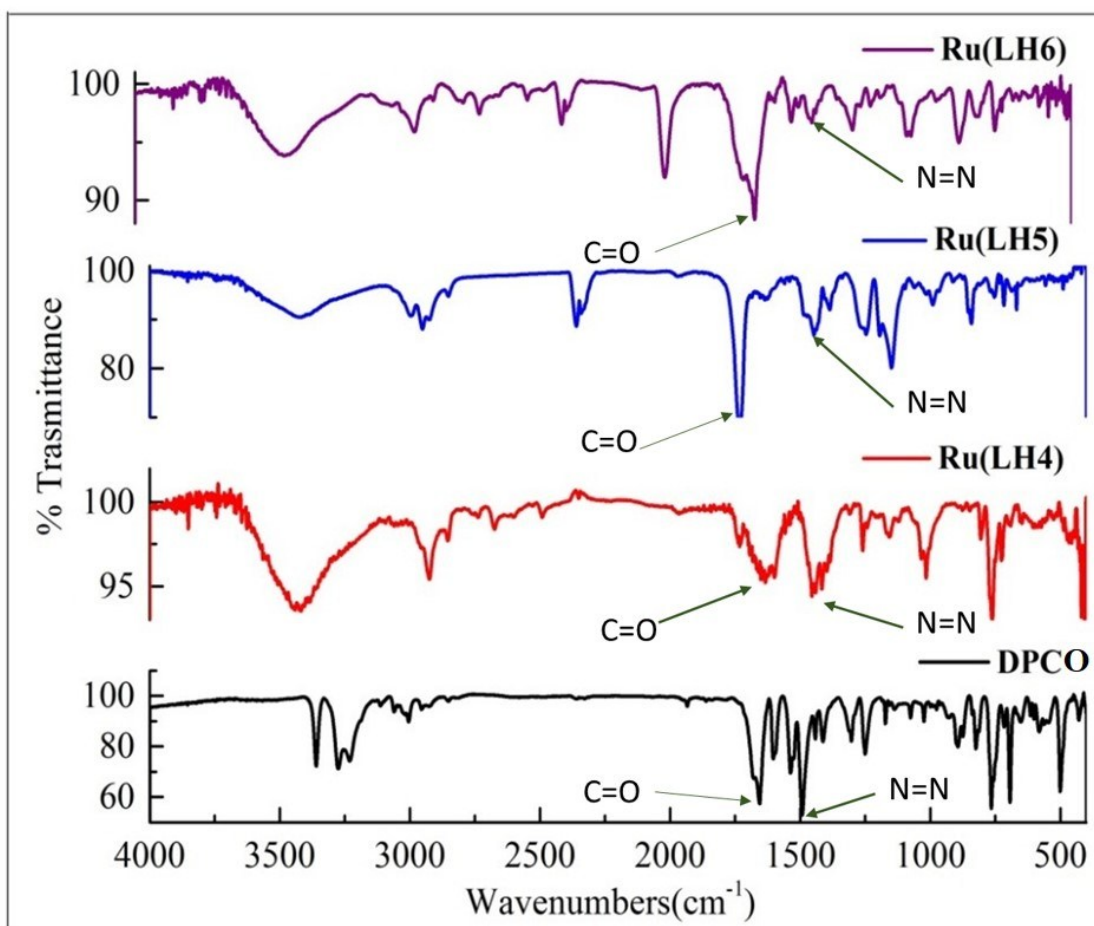

ESI. Fig. S7. The FT-IR spectra of DPCO and Ru(LH4-6) complexes with KBr disk.



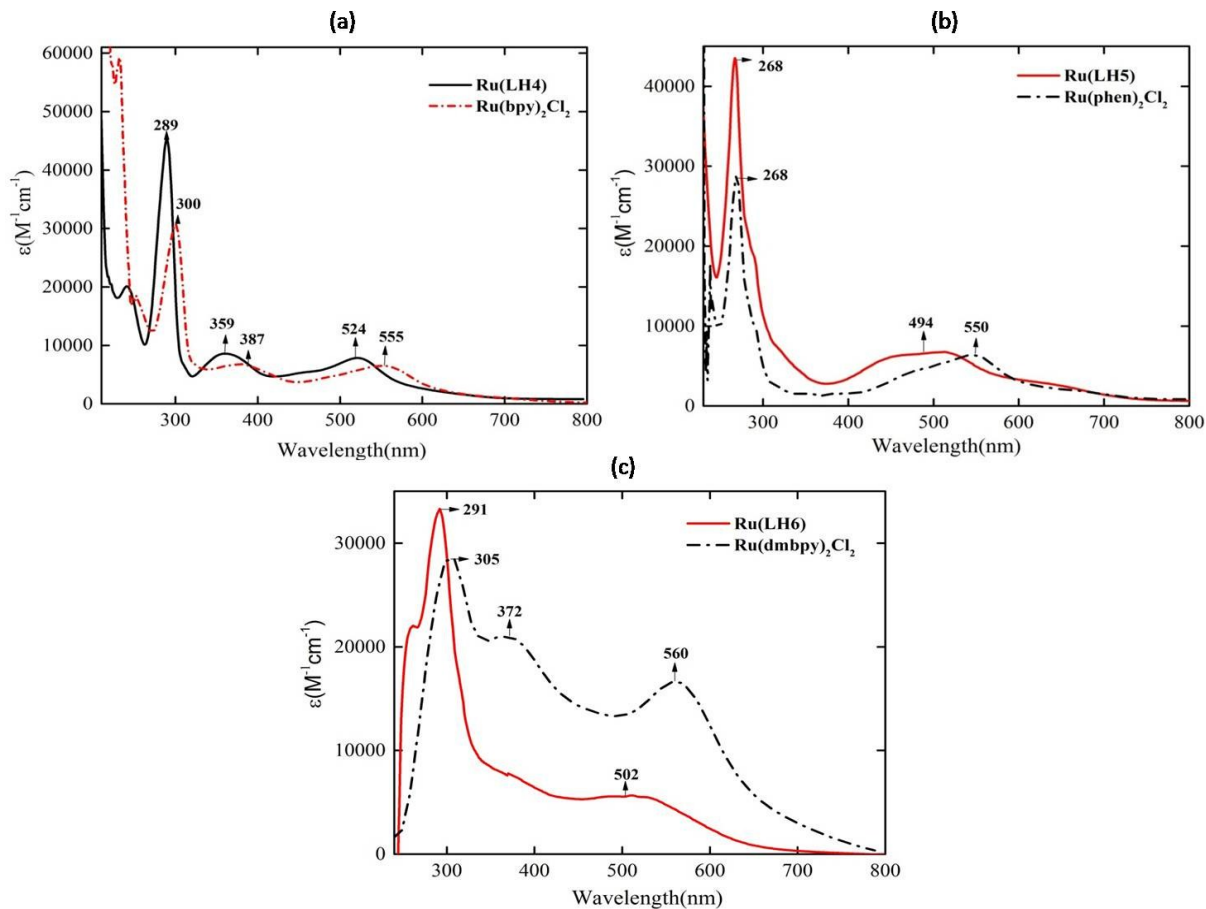

ESI. Fig. S8. The UV-Vis spectra of precursor and products of Ru(LH4-6) in methanol.

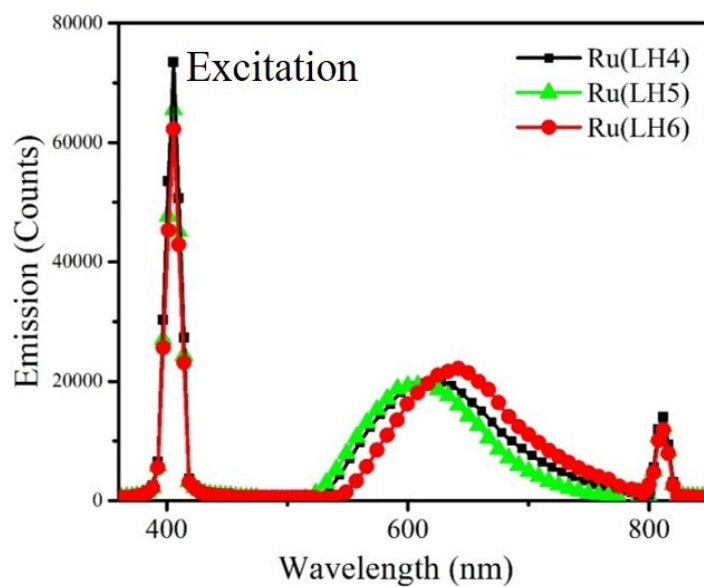

ESI. Fig. S9. The emission spectra of Ru(LH4-6) in methanol. The excitation wavelengths of first and second harmonics of laser source at 405 nm and 810 nm are also shown, respectively.

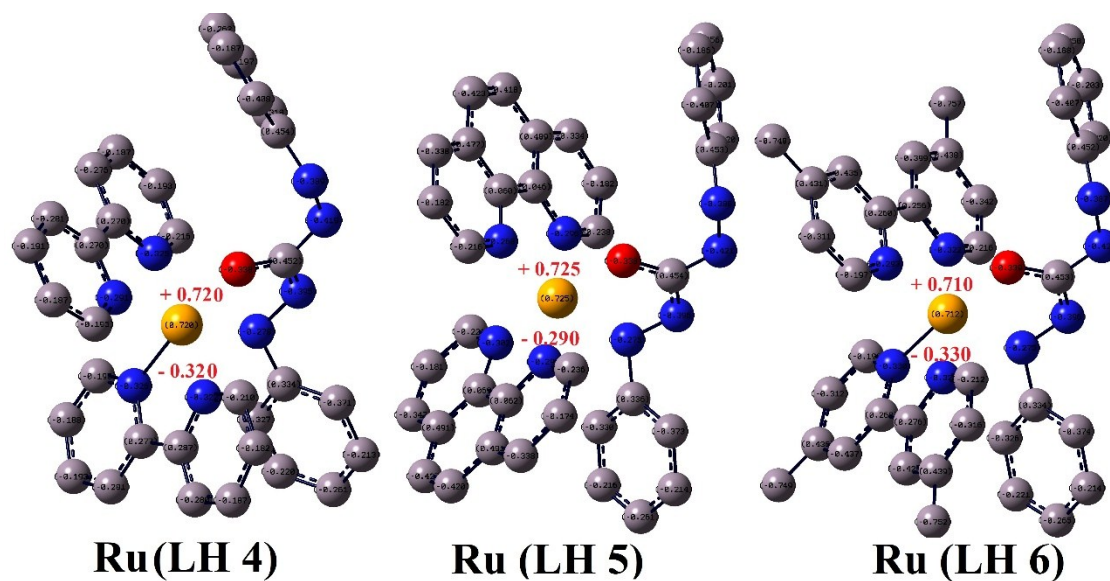

**ESI. Figure S10.** Charge distribution values of Ru(LH4-6) complexes obtained from the DFT method through LANL2DZ/6-31G\* basis set.

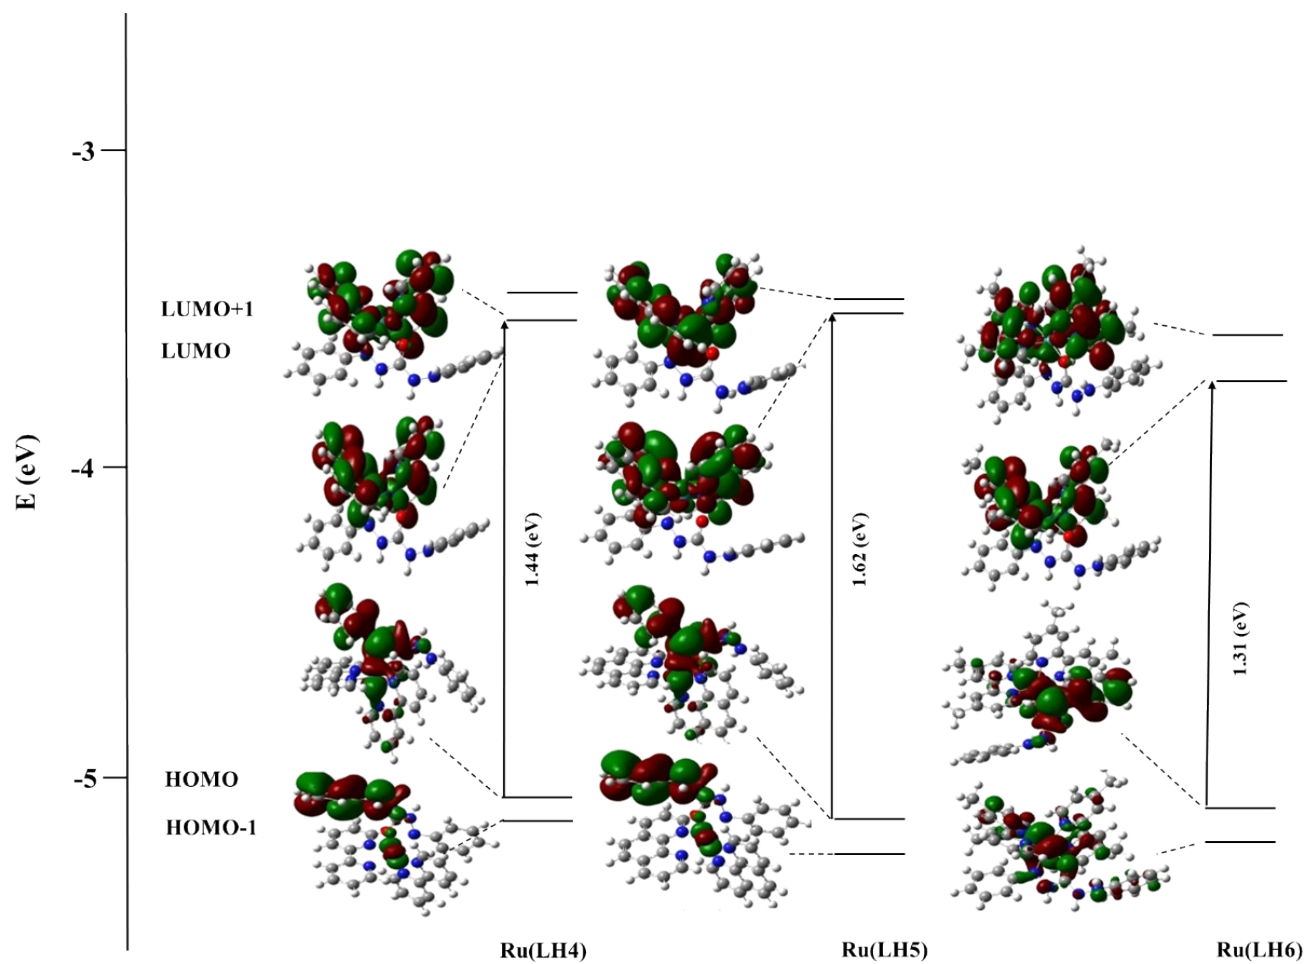

**ESI. Figure S11.** Isosurfaces (Isodensity contour= 0.03) for HOMO and LUMO of complexes obtained from the DFT method through LANL2DZ/6-31G\* basis set.

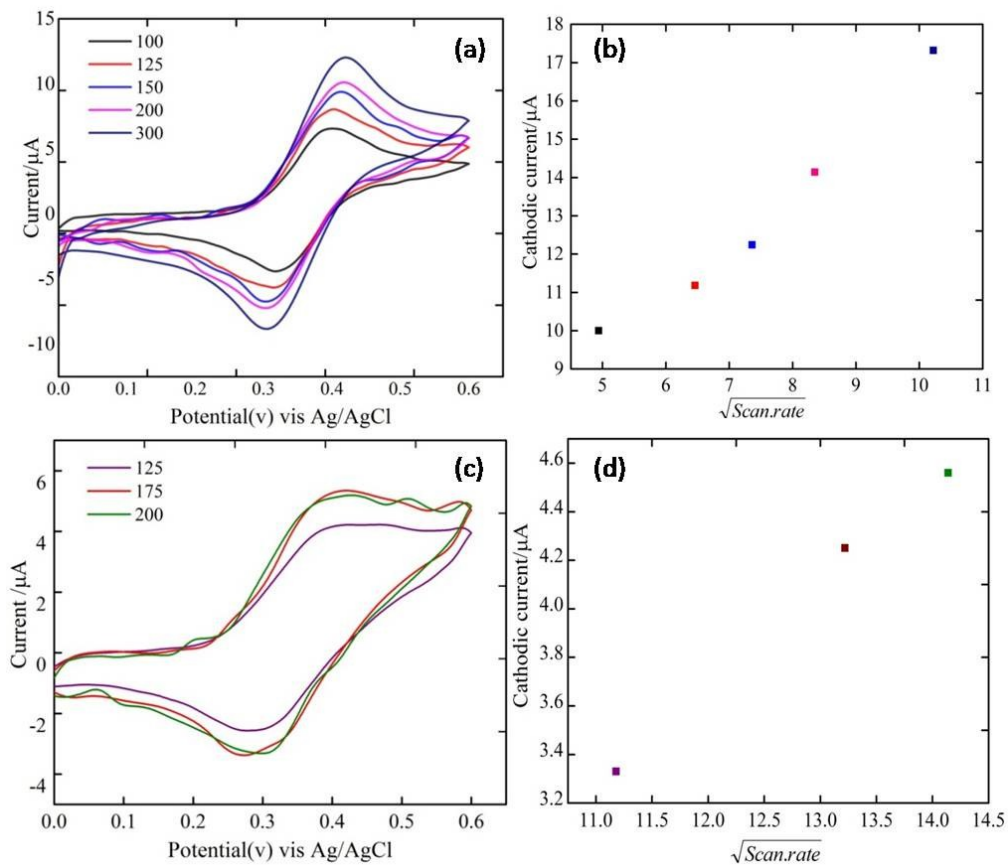

**ESI. Fig. S12.** Figures (a) and (c) show the varied scan rates for Ru(LH4) and Ru(LH5), respectively. Figures (b) and (d) show Survey of diffusion current of Ru(LH4) and Ru(LH5), respectively. All experiments were done under a dry  $\text{N}_2$  atmosphere at 298 K in a three-electrode configuration by using a Pt-disk working electrode and a Pt-wire auxiliary electrode. The potentials are referenced to a saturated Ag/AgCl reference electrode. The supporting electrolyte was 0.1 M tetrabutylammonium perchlorate (TBAP) in methanol solutions.

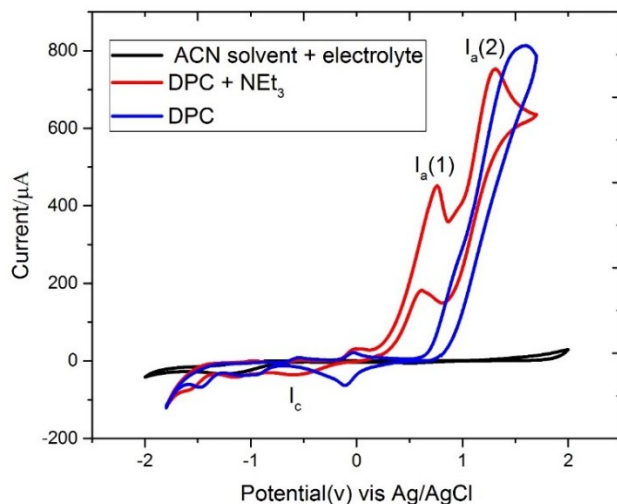

**ESI. Fig. S13.** The CV of DPC, DPC with  $\text{NEt}_3$  and background (ACN + electrolyte). The electrolytic cell consists of platinum disc as the working electrode, a platinum wire as the counter electrode, and Ag/AgCl as the reference electrode. The supporting electrolyte was 0.1 molL<sup>-1</sup> tetrabutylammonium perchlorate (TBAP) in acetonitrile solutions.

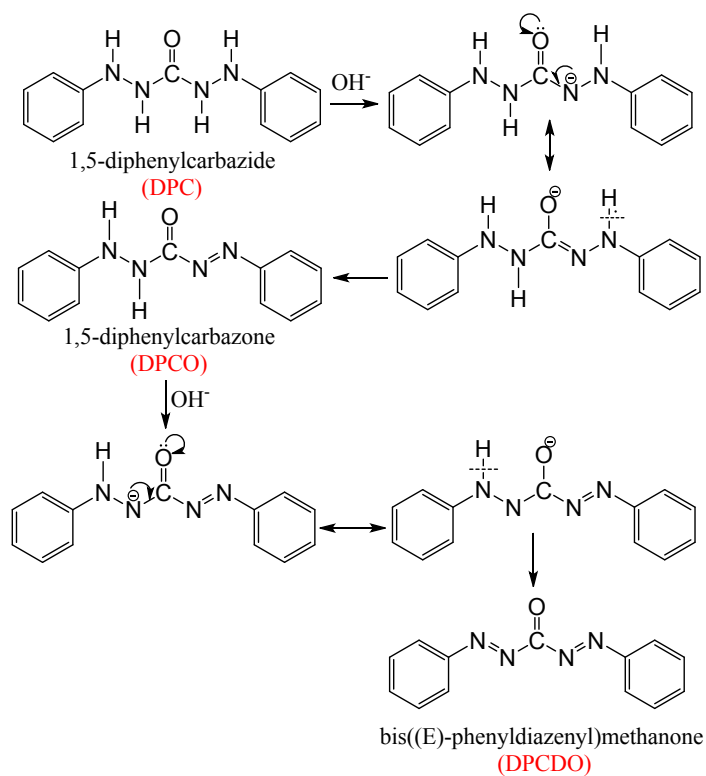

**Scheme S1.** Chemical structures commonly proposed for DPC, DPCO and DPDO undergo oxidation in alkaline medium. 1,5-diphenylcarbazine (DPCO), 1,5-diphenylcarbazone (DPCO), 1,5-diphenylcarbadizone (DPDO).

**ESI. Table S1.** The energy levels complexes Ru(LH4)-Ru(LH6) calculated using LANL2DZ/6-31G\* basis set.

| Complex | HOMO<br>(eV) | LUMO<br>(eV) | Band Gap<br>(eV) |
|---------|--------------|--------------|------------------|
| Ru(LH4) | -5.01        | -3.57        | 1.44             |
| Ru(LH5) | -5.12        | -2.50        | 2.62             |
| Ru(LH6) | -5.06        | -3.75        | 1.31             |

**ESI. Table S2.** The  $\lambda_{\text{max}}$  data of MLCT of precursor and products of Ru(LH4-6).

|                      | Precursor                              | Products                      |
|----------------------|----------------------------------------|-------------------------------|
| Ru(LH4)              | Ru(bpy) <sub>2</sub> Cl <sub>2</sub>   | Ru(bpy) <sub>2</sub> (DPCO)   |
| $\lambda$ max (MLCT) | 555                                    | 524                           |
| Ru(LH5)              | Ru(phen) <sub>2</sub> Cl <sub>2</sub>  | Ru(phen) <sub>2</sub> (DPCO)  |
| $\lambda$ max (MLCT) | 550                                    | 494                           |
| Ru(LH6)              | Ru(dmbpy) <sub>2</sub> Cl <sub>2</sub> | Ru(dmbpy) <sub>2</sub> (DPCO) |
| $\lambda$ max (MLCT) | 502                                    | 560                           |

**ESI. Table S3.** E<sub>ox</sub> data of Ru(III)/Ru(II) potentials for Ru X,Y,Z, complexes measured in organic phase solvent. All data are vs NHE.

| Complexes                                                             | E <sub>ox</sub> <sup>1/2</sup> | Ref |
|-----------------------------------------------------------------------|--------------------------------|-----|
| Ru(bpy) <sub>2</sub> (CH <sub>3</sub> CN)NO <sup>3+</sup>             | 0.8                            | 3   |
| Ru(bpy) <sub>2</sub> (CH <sub>3</sub> CN)NO <sub>2</sub> <sup>+</sup> | 1.41                           | 3   |
| Ru(bpy) <sub>2</sub> (CH <sub>3</sub> CN)NO <sub>3</sub> <sup>+</sup> | 1.26                           | 3   |
| Ru(bpy) <sub>2</sub> (py)N <sub>3</sub> <sup>+</sup>                  | 0.82                           | 3   |
| Ru(bpy) <sub>2</sub> (py)NO <sub>2</sub> <sup>+</sup>                 | 1.3                            | 3   |
| Ru(bpy) <sub>2</sub> (py)NO <sub>3</sub> <sup>+</sup>                 | 1.16                           | 3   |
| Ru(bpy) <sub>2</sub> (4-t-Bupy)NO <sub>3</sub> <sup>+</sup>           | 1.12                           | 3   |
| Ru(bpy) <sub>2</sub> (4-vinyl-py)NO <sub>2</sub> <sup>+</sup>         | 1.27                           | 3   |
| Ru(bpy) <sub>2</sub> (4-vinyl-py)NO <sub>3</sub> <sup>+</sup>         | 1.15                           | 3   |
| Ru(bpy) <sub>2</sub> (Cl)NO <sub>2</sub>                              | 0.81                           | 3   |
| Ru(bpy) <sub>2</sub> (Cl)NO <sub>3</sub>                              | 0.69                           | 3   |
| Ru(bpy) <sub>2</sub> (py)CH <sub>3</sub> CN <sup>+2</sup>             | 1.6                            | 3   |
| Ru(bpy) <sub>2</sub> (py)CN <sup>+</sup>                              | 1.28                           | 3   |
| Ru(bpy) <sub>2</sub> (py)Cl <sup>+</sup>                              | 1.01                           | 3   |
| Ru(bpy) <sub>2</sub> (py)TFA <sup>+</sup>                             | 1.13                           | 3   |
| Ru(bpy) <sub>2</sub> (4-Ac-py)Cl <sup>+</sup>                         | 1.06                           | 3   |
| Ru(bpy) <sub>2</sub> (4-vinyl-py)CH <sub>3</sub> CN <sup>2+</sup>     | 1.53                           | 3   |
| Ru(bpy) <sub>2</sub> (4-vinyl-py)Cl <sup>+</sup>                      | 1                              | 3   |
| Ru(bpy) <sub>2</sub> (pyrimH)Cl <sup>2+</sup>                         | 1.21                           | 3   |
| Ru(bpy) <sub>2</sub> (pyr)Cl <sup>+</sup>                             | 1.12                           | 3   |
| Ru(bpy) <sub>2</sub> (pyr)NO <sub>2</sub> <sup>3+</sup>               | 1.38                           | 3   |
| Ru(bpy) <sub>2</sub> (BPA)Cl <sup>+</sup>                             | 1.01                           | 3   |
| Ru(bpy) <sub>2</sub> (BPE)Cl <sup>+</sup>                             | 1.02                           | 3   |
| Ru(bpy) <sub>2</sub> (MPP)Cl <sup>+</sup>                             | 1.15                           | 3   |
| Ru(bpy) <sub>2</sub> (MeP)Cl <sup>+</sup>                             | 1.18                           | 3   |
| Ru(bpy) <sub>2</sub> (PDP)Cl <sup>+</sup>                             | 1.15                           | 3   |
| Ru(bpy) <sub>2</sub> (PPh <sub>3</sub> )NO <sub>2</sub> <sup>+</sup>  | 1.49                           | 3   |
| Ru(bpy) <sub>2</sub> (PPh <sub>3</sub> )NO <sub>3</sub> <sup>+</sup>  | 1.31                           | 3   |
| Ru(bpy)(phendione) <sub>2</sub> <sup>2+</sup>                         | 1.67                           | 4   |
| c-Ru(bpy) <sub>2</sub> (Ph <sub>2</sub> MeP)Cl <sup>+</sup>           | 1.15                           | 5   |
| c-Ru(bpy) <sub>2</sub> (Ph <sub>3</sub> P)Cl <sup>+</sup>             | 1.18                           | 5   |
| Ru(bpy)(terpy)(CH <sub>3</sub> CN) <sup>2+</sup>                      | 1.55                           | 3   |
| Ru(bpy)(terpy)(NH <sub>3</sub> ) <sup>2+</sup>                        | 1.41                           | 3   |
| Ru(bpy)(terpy)(CN) <sup>+</sup>                                       | 1.3                            | 6   |
| Ru(bpy)(biq)(4,4-Me <sub>2</sub> bpy) <sup>2+</sup>                   | 1.54                           | 7   |
| Ru(bpy)(biq)(phen) <sup>2+</sup>                                      | 1.59                           | 7   |
| Ru(bpy)(biq)(pq) <sup>2+</sup>                                        | 1.63                           | 7   |
| Ru(bpy)(biq)(i-biq) <sup>2+</sup>                                     | 1.53                           | 7   |
| Ru(bpy)(biq)(biimH <sub>2</sub> ) <sup>2+</sup>                       | 1.33                           | 7   |
| Ru(bpy)(biq)(bipyrim) <sup>2+</sup>                                   | 1.7                            | 7   |
| Ru(bpy)(biq)(binapy) <sup>2+</sup>                                    | 1.51                           | 7   |
| Ru(bpy)(biq)Cl <sub>2</sub>                                           | 0.7                            | 8   |
| Ru(bpz) <sub>2</sub> (CH <sub>3</sub> CN)Cl <sup>+</sup>              | 1.56                           | 9   |
| Ru(bpz) <sub>2</sub> Cl <sub>2</sub>                                  | 1.04                           | 9   |
| Ru(bpz) <sub>2</sub> Br <sub>2</sub>                                  | 1.03                           | 10  |
| Ru(bpz) <sub>2</sub> (NO <sub>2</sub> ) <sub>2</sub>                  | 1.42                           | 10  |
| Ru(phen) <sub>2</sub> (CH <sub>3</sub> CN) <sub>2</sub> <sup>2+</sup> | 1.68                           | 3   |
| Ru(phen) <sub>2</sub> (CN) <sub>2</sub>                               | 1.12                           | 3   |
| Ru(phen) <sub>2</sub> (py) <sub>2</sub> <sup>2+</sup>                 | 1.51                           | 3   |

|                                                                         |      |    |
|-------------------------------------------------------------------------|------|----|
| Ru(phen) <sub>2</sub> (4-vinyl-py) <sub>2</sub> <sup>2+</sup>           | 1.49 | 3  |
| Ru(phen) <sub>2</sub> (pyz)Cl <sup>+</sup>                              | 1.1  | 3  |
| Ru(phen) <sub>2</sub> (naphthyridine) <sup>2+</sup>                     | 1.51 | 3  |
| Ru(phen) <sub>2</sub> (py) <sub>2</sub> <sup>2+</sup>                   | 1.51 | 11 |
| Ru(phen) <sub>2</sub> (en) <sup>2+</sup>                                | 1.12 | 11 |
| Ru(phen) <sub>2</sub> (py)Cl <sup>+</sup>                               | 1.04 | 11 |
| Ru(phen) <sub>2</sub> (acac) <sup>+</sup>                               | 0.87 | 11 |
| Ru(phen) <sub>2</sub> (ox)                                              | 0.72 | 11 |
| Ru(phen) <sub>2</sub> Cl <sub>2</sub>                                   | 0.57 | 11 |
| Ru(4,7-Me <sub>2</sub> phen) <sub>2</sub> (pyz)Cl <sup>+</sup>          | 1.01 | 3  |
| Ru(terpy)(BPE) <sub>3</sub> <sup>2+</sup>                               | 1.47 | 3  |
| Ru(terpy)(py) <sub>3</sub> <sup>2+</sup>                                | 1.5  | 12 |
| Ru(terpy)(CH <sub>3</sub> CN) <sub>3</sub> <sup>2+</sup>                | 1.73 | 12 |
| c-Ru(terpy)(CH <sub>3</sub> CN) <sub>2</sub> Cl <sup>+</sup>            | 1.17 | 12 |
| t-Ru(terpy)(py) <sub>2</sub> Cl <sup>+</sup>                            | 1.07 | 12 |
| Ru(terpy)(py) <sub>2</sub> (CH <sub>3</sub> CN) <sup>2+</sup>           | 1.53 | 12 |
| Ru(terpy)(py)(CH <sub>3</sub> CN)Cl <sup>+</sup>                        | 1.09 | 12 |
| Ru(terpy)(py)(PPh <sub>3</sub> )Cl <sup>+</sup>                         | 1.1  | 12 |
| Ru(pydipy) <sub>2</sub> (CH <sub>3</sub> CN) <sub>2</sub> <sup>2+</sup> | 1.6  | 3  |
| Ru(Azpy) <sub>2</sub> Br <sub>2</sub>                                   | 1.19 | 3  |
| Ru(Azpy) <sub>2</sub> Cl <sub>2</sub>                                   | 1.20 | 3  |
| Ru(MeAzpy) <sub>2</sub> Br <sub>2</sub>                                 | 1.13 | 3  |
| Ru(MeAzpy) <sub>2</sub> Cl <sub>2</sub>                                 | 1.14 | 3  |
| Ru(TZ)(CH <sub>3</sub> CN) <sub>2</sub>                                 | 1.29 | 13 |
| Ru(TZ)(py) <sub>2</sub>                                                 | 1.05 | 13 |
| Ru(TZ)(py)(CH <sub>3</sub> CN)                                          | 1.16 | 13 |
| Ru(TZ)(4,4-bpy) <sub>2</sub>                                            | 1.08 | 13 |
| Ru(biq) <sub>2</sub> Cl <sub>2</sub>                                    | 0.72 | 14 |
| Ru(biq) <sub>2</sub> (PEt <sub>3</sub> )H <sub>2</sub> O <sup>2+</sup>  | 1.48 | 14 |
| Ru(biq) <sub>2</sub> (CN) <sub>2</sub>                                  | 1.17 | 6  |
| m-Ru(py) <sub>3</sub> Cl <sub>3</sub>                                   | 0.08 | 14 |
| RuBr <sub>2</sub> (SMe <sub>2</sub> ) <sub>3</sub> (DMSO)               | 1.05 | 15 |
| RuBr <sub>2</sub> (SEt <sub>2</sub> ) <sub>3</sub> (DMSO)               | 1.03 | 15 |
| RuCl <sub>2</sub> (SMe <sub>2</sub> ) <sub>4</sub>                      | 0.80 | 15 |
| RuCl <sub>2</sub> (SEt <sub>2</sub> ) <sub>3</sub> (DMSO)               | 1.04 | 15 |
| RuCl <sub>2</sub> (SMe <sub>2</sub> ) <sub>2</sub> (DMSO) <sub>2</sub>  | 0.94 | 15 |
| Ru(DMCH) <sub>2</sub> (CN) <sub>2</sub>                                 | 1.04 | 6  |
| Ru(i-biq) <sub>2</sub> (CN) <sub>2</sub>                                | 1.01 | 6  |
| Ru(terpy)(dppyz)Cl <sup>+</sup>                                         | 1.18 | 17 |
| Ru(Azpy) <sub>2</sub> (N <sub>3</sub> ) <sub>2</sub>                    | 1.2  | 3  |
| Ru(bpy) <sub>2</sub> (CH <sub>3</sub> CN)Cl <sup>+</sup>                | 1.09 | 3  |
| Ru(bpy) <sub>2</sub> (NH <sub>3</sub> )(NO <sub>2</sub> ) <sup>+</sup>  | 1.09 | 3  |
| Ru(bpy) <sub>2</sub> (NH <sub>3</sub> )(NO <sub>3</sub> ) <sup>+</sup>  | 0.94 | 3  |
| t-Ru(terpy)(4-pic) <sub>2</sub> Cl <sup>+</sup>                         | 1.02 | 12 |
| Ru(terpy)(4-pic) <sub>3</sub> <sup>2+</sup>                             | 1.47 | 12 |
| Ru(terpy)(Py) <sub>2</sub> (4-pic) <sup>2+</sup>                        | 1.47 | 12 |
| Ru(bpy)(biq)(PEt <sub>3</sub> )Cl <sup>+</sup>                          | 1.19 | 14 |
| Ru(bpy)(biq)(P(n-Pr) <sub>3</sub> )Cl <sup>+</sup>                      | 1.2  | 14 |
| Ru(bpy)(biq)(P(n-Bu) <sub>3</sub> )Cl <sup>+</sup>                      | 1.2  | 14 |
| Ru(bpy)(biq)(PPh <sub>3</sub> )Cl <sup>+</sup>                          | 1.26 | 14 |



**ESI. Table S4.** The colorimetric, densitometry and RGB data of LEC based on Ru(bpy)<sub>3</sub><sup>2+</sup> and Ru(LH4-6).

| <b>Ru(LH4)</b>  |                   |          |          |          |          |          |          |          |          |              |              |          |           |              |              |
|-----------------|-------------------|----------|----------|----------|----------|----------|----------|----------|----------|--------------|--------------|----------|-----------|--------------|--------------|
| <b>Observer</b> | <b>Illuminant</b> | <b>X</b> | <b>Y</b> | <b>Z</b> | <b>x</b> | <b>y</b> | <b>L</b> | <b>a</b> | <b>b</b> | <b>C(ab)</b> | <b>H(ab)</b> | <b>u</b> | <b>v</b>  | <b>C(uv)</b> | <b>H(uv)</b> |
| 2-Degree        | A                 | 0.1569   | 0.0853   | 0.0152   | 0.6096   | 0.3315   | 35.07    | 41.26    | 18.22    | 45.10        | 23.82        | 76.37    | -<br>2.83 | 76.42        | 357.88       |
|                 | B                 | 0.1125   | 0.0704   | 0.0361   | 0.5139   | 0.3214   | 31.89    | 35.68    | 12.90    | 37.94        | 19.88        | 57.61    | 4.59      | 57.79        | 4.56         |
|                 | C                 | 0.1001   | 0.0659   | 0.0498   | 0.4637   | 0.3053   | 30.85    | 31.71    | 11.17    | 33.62        | 19.40        | 49.13    | 7.27      | 49.67        | 8.42         |
|                 | D                 | 0.1074   | 0.0689   | 0.0350   | 0.5085   | 0.3261   | 31.55    | 35.63    | 12.26    | 37.68        | 18.99        | 55.71    | 3.95      | 55.85        | 4.06         |
|                 | E                 | 0.1094   | 0.0691   | 0.0421   | 0.4960   | 0.3132   | 31.59    | 33.97    | 12.51    | 36.20        | 20.22        | 54.84    | 6.24      | 55.20        | 6.49         |
|                 | F2                | 0.0664   | 0.0529   | 0.0279   | 0.4510   | 0.3591   | 27.53    | 15.35    | 5.83     | 16.42        | 20.79        | 21.94    | 1.72      | 22.00        | 4.48         |
|                 | F7                | 0.0857   | 0.0610   | 0.0454   | 0.4462   | 0.3175   | 29.66    | 27.39    | 9.35     | 28.95        | 18.85        | 39.98    | 5.58      | 40.37        | 7.94         |
|                 | F11               | 0.0655   | 0.0527   | 0.0267   | 0.4522   | 0.3637   | 27.50    | 13.46    | 5.77     | 14.65        | 23.21        | 19.61    | 1.81      | 19.69        | 5.27         |
|                 | Blackbody         | 0.1075   | 0.0687   | 0.0364   | 0.5059   | 0.3230   | 31.50    | 34.51    | 12.28    | 36.63        | 19.59        | 54.71    | 4.52      | 54.90        | 4.73         |
|                 | Custom            | 0.1094   | 0.0691   | 0.0421   | 0.4960   | 0.3132   | 31.59    | 33.97    | 12.51    | 36.20        | 20.22        | 54.84    | 6.24      | 55.20        | 6.49         |
| 10-Degree       | A                 | 0.1458   | 0.0834   | 0.0149   | 0.5973   | 0.3416   | 34.67    | 35.62    | 17.64    | 39.75        | 26.35        | 65.66    | -<br>1.61 | 65.68        | 358.60       |
|                 | B                 | 0.1035   | 0.0684   | 0.0355   | 0.4989   | 0.3299   | 31.45    | 30.86    | 12.24    | 33.20        | 21.64        | 49.29    | 5.00      | 49.54        | 5.79         |
|                 | C                 | 0.0914   | 0.0639   | 0.0487   | 0.4480   | 0.3132   | 30.38    | 27.41    | 10.48    | 29.34        | 20.92        | 41.74    | 7.23      | 42.36        | 9.82         |
|                 | D                 | 0.0990   | 0.0671   | 0.0343   | 0.4941   | 0.3346   | 31.13    | 30.77    | 11.64    | 32.90        | 20.72        | 47.66    | 4.36      | 47.85        | 5.22         |
|                 | E                 | 0.1004   | 0.0671   | 0.0418   | 0.4797   | 0.3205   | 31.13    | 29.25    | 11.84    | 31.55        | 22.04        | 46.74    | 6.60      | 47.20        | 8.04         |
|                 | F2                | 0.0660   | 0.0525   | 0.0285   | 0.4488   | 0.3573   | 27.44    | 12.63    | 5.77     | 13.89        | 24.56        | 18.83    | 2.18      | 18.95        | 6.59         |
|                 | F7                | 0.0803   | 0.0597   | 0.0448   | 0.4345   | 0.3233   | 29.34    | 23.37    | 8.91     | 25.01        | 20.86        | 34.15    | 5.74      | 34.63        | 9.55         |
|                 | F11               | 0.0651   | 0.0525   | 0.0271   | 0.4500   | 0.3627   | 27.43    | 11.42    | 5.74     | 12.78        | 26.70        | 17.19    | 2.18      | 17.33        | 7.22         |
|                 | Blackbody         | 0.0992   | 0.0669   | 0.0360   | 0.4910   | 0.3307   | 31.08    | 29.70    | 11.68    | 31.92        | 21.46        | 46.75    | 4.99      | 47.01        | 6.09         |
|                 | Custom            | 0.1004   | 0.0671   | 0.0418   | 0.4797   | 0.3205   | 31.13    | 29.25    | 11.84    | 31.55        | 22.04        | 46.74    | 6.60      | 47.20        | 8.04         |

| <b>Working Space</b> | <b>Reference Illuminant</b> | <b>Range = [0.0, 1.0]</b> |              |             | <b>Range = [0, 255]</b> |              |             |
|----------------------|-----------------------------|---------------------------|--------------|-------------|-------------------------|--------------|-------------|
|                      |                             | <b>Red</b>                | <b>Green</b> | <b>Blue</b> | <b>Red</b>              | <b>Green</b> | <b>Blue</b> |
| Adobe RGB (1998)     | D65                         | 0.4123                    | 0.2051       | 0.2323      | 105                     | 52           | 59          |
| Apple RGB            | D65                         | 0.3815                    | 0.1339       | 0.1694      | 97                      | 34           | 43          |
| Best RGB             | D50                         | 0.4176                    | 0.2470       | 0.2375      | 106                     | 63           | 61          |
| Beta RGB             | D50                         | 0.4132                    | 0.2215       | 0.2384      | 105                     | 56           | 61          |
| Bruce RGB            | D65                         | 0.4451                    | 0.2051       | 0.2323      | 114                     | 52           | 59          |
| CIE RGB              | E                           | 0.4556                    | 0.2466       | 0.2368      | 116                     | 63           | 60          |
| Color Match RGB      | D50                         | 0.3927                    | 0.1228       | 0.1681      | 100                     | 31           | 43          |
| Don RGB 4            | D50                         | 0.4179                    | 0.2282       | 0.2366      | 107                     | 58           | 60          |
| ECI RGB v2           | D50                         | 0.4535                    | 0.2011       | 0.2478      | 116                     | 51           | 63          |
| Ekta Space PS5 RGB   | D50                         | 0.4304                    | 0.2262       | 0.2382      | 110                     | 58           | 61          |
| NTSC RGB             | C                           | 0.4114                    | 0.2084       | 0.2388      | 105                     | 53           | 61          |
| PAL/SECAM RGB        | D65                         | 0.4590                    | 0.2051       | 0.2337      | 117                     | 52           | 60          |
| ProPhoto RGB         | D50                         | 0.3153                    | 0.1810       | 0.1727      | 80                      | 46           | 44          |
| SMPTE-C RGB          | D65                         | 0.4779                    | 0.1949       | 0.2339      | 122                     | 50           | 60          |
| sRGB                 | D65                         | 0.4695                    | 0.1919       | 0.2230      | 120                     | 49           | 57          |
| Wide Gamut RGB       | D50                         | 0.4023                    | 0.2467       | 0.2370      | 103                     | 63           | 60          |

| <b>Density</b> | <b>Red</b> | <b>Green</b> | <b>Blue</b> | <b>Visual</b> |
|----------------|------------|--------------|-------------|---------------|
| Status A       | 0.648      | 1.352        | 1.383       | -             |
| Status E       | 1.057      | 1.354        | 1.384       | -             |
| Status M       | 0.267      | 1.352        | 1.373       | -             |
| Status T       | 1.057      | 1.354        | 1.372       | -             |

|        |   |   |   |       |
|--------|---|---|---|-------|
| Visual | - | - | - | 1.069 |
| Type 1 | - | - | - | 1.400 |
| Type 2 | - | - | - | 1.399 |

Continued ESI. Table S4.

|           |            | Ru(LH5) |        |        |        |        |       |       |       |       |       |        |       |        |        |
|-----------|------------|---------|--------|--------|--------|--------|-------|-------|-------|-------|-------|--------|-------|--------|--------|
| Observer  | Illuminant | X       | Y      | Z      | x      | y      | L     | a     | b     | C(ab) | H(ab) | u      | v     | C(uv)  | H(uv)  |
| 2-Degree  | A          | 0.2181  | 0.0970 | 0.0073 | 0.6766 | 0.3009 | 37.29 | 61.97 | 37.20 | 72.28 | 30.97 | 125.49 | -4.47 | 125.57 | 357.96 |
|           | B          | 0.1487  | 0.0708 | 0.0174 | 0.6278 | 0.2988 | 31.98 | 58.88 | 28.09 | 65.24 | 25.50 | 107.04 | 8.05  | 107.35 | 4.30   |
|           | C          | 0.1278  | 0.0627 | 0.0241 | 0.5956 | 0.2922 | 30.08 | 54.87 | 24.83 | 60.23 | 24.35 | 96.75  | 13.24 | 97.65  | 7.80   |
|           | D          | 0.1419  | 0.0684 | 0.0168 | 0.6248 | 0.3011 | 31.44 | 59.51 | 27.14 | 65.40 | 24.52 | 104.93 | 7.00  | 105.16 | 3.82   |
|           | E          | 0.1433  | 0.0686 | 0.0204 | 0.6170 | 0.2954 | 31.49 | 56.94 | 27.29 | 63.15 | 25.61 | 104.04 | 11.04 | 104.62 | 6.06   |
|           | F2         | 0.0763  | 0.0426 | 0.0137 | 0.5753 | 0.3213 | 24.52 | 38.00 | 15.26 | 40.95 | 21.88 | 58.35  | 2.31  | 58.39  | 2.27   |
|           | F7         | 0.1078  | 0.0552 | 0.0221 | 0.5822 | 0.2982 | 28.18 | 51.63 | 21.56 | 55.95 | 22.66 | 85.07  | 10.00 | 85.66  | 6.71   |
|           | F11        | 0.0933  | 0.0515 | 0.0131 | 0.5906 | 0.3264 | 27.17 | 39.94 | 19.81 | 44.59 | 26.38 | 65.97  | 3.71  | 66.07  | 3.22   |
|           | Blackbody  | 0.1417  | 0.0682 | 0.0176 | 0.6231 | 0.2997 | 31.39 | 58.06 | 27.09 | 64.07 | 25.02 | 103.80 | 7.95  | 104.11 | 4.38   |
|           | Custom     | 0.1433  | 0.0686 | 0.0204 | 0.6170 | 0.2954 | 31.49 | 56.94 | 27.29 | 63.15 | 25.61 | 104.04 | 11.04 | 104.62 | 6.06   |
| 10-Degree | A          | 0.2006  | 0.0946 | 0.0072 | 0.6635 | 0.3128 | 36.85 | 54.76 | 36.48 | 65.80 | 33.67 | 110.23 | -2.62 | 110.26 | 358.64 |
|           | B          | 0.1340  | 0.0679 | 0.0172 | 0.6117 | 0.3100 | 31.32 | 52.55 | 27.00 | 59.08 | 27.19 | 94.03  | 8.83  | 94.44  | 5.37   |
|           | C          | 0.1138  | 0.0597 | 0.0236 | 0.5775 | 0.3028 | 29.33 | 49.16 | 23.58 | 54.52 | 25.63 | 84.52  | 13.29 | 85.56  | 8.94   |
|           | D          | 0.1280  | 0.0657 | 0.0166 | 0.6089 | 0.3124 | 30.80 | 53.08 | 26.09 | 59.14 | 26.18 | 92.17  | 7.77  | 92.50  | 4.82   |
|           | E          | 0.1287  | 0.0657 | 0.0203 | 0.5995 | 0.3059 | 30.80 | 50.72 | 26.13 | 57.05 | 27.26 | 91.18  | 11.80 | 91.94  | 7.37   |
|           | F2         | 0.0728  | 0.0422 | 0.0140 | 0.5641 | 0.3272 | 24.39 | 32.42 | 15.07 | 35.76 | 24.93 | 51.04  | 3.41  | 51.15  | 3.82   |
|           | F7         | 0.0979  | 0.0533 | 0.0219 | 0.5657 | 0.3078 | 27.64 | 45.64 | 20.67 | 50.10 | 24.37 | 74.45  | 10.43 | 75.17  | 7.97   |
|           | F11        | 0.0896  | 0.0512 | 0.0133 | 0.5812 | 0.3323 | 27.09 | 35.24 | 19.70 | 40.38 | 29.21 | 59.31  | 4.79  | 59.50  | 4.62   |
|           | Blackbody  | 0.1280  | 0.0655 | 0.0175 | 0.6067 | 0.3106 | 30.76 | 51.65 | 26.05 | 57.84 | 26.77 | 91.11  | 8.84  | 91.53  | 5.55   |
|           | Custom     | 0.1287  | 0.0657 | 0.0203 | 0.5995 | 0.3059 | 30.80 | 50.72 | 26.13 | 57.05 | 27.26 | 91.18  | 11.80 | 91.94  | 7.37   |

| Working Space      | Reference Illuminant | Range = [0.0, 1.0] |         |        | Range = [0, 255] |       |      |
|--------------------|----------------------|--------------------|---------|--------|------------------|-------|------|
|                    |                      | Red                | Green   | Blue   | Red              | Green | Blue |
| Adobe RGB (1998)   | D65                  | 0.4889             | -0.0756 | 0.1568 | 125              | -19   | 40   |
| Apple RGB          | D65                  | 0.4846             | -0.0803 | 0.1082 | 124              | -20   | 28   |
| Best RGB           | D50                  | 0.4938             | 0.1910  | 0.1702 | 126              | 49    | 43   |
| Beta RGB           | D50                  | 0.4872             | 0.1117  | 0.1728 | 124              | 28    | 44   |
| Bruce RGB          | D65                  | 0.5387             | -0.0756 | 0.1566 | 137              | -19   | 40   |
| CIE RGB            | E                    | 0.5500             | 0.1903  | 0.1701 | 140              | 49    | 43   |
| ColorMatch RGB     | D50                  | 0.4975             | -0.1030 | 0.1038 | 127              | -26   | 26   |
| Don RGB 4          | D50                  | 0.4942             | 0.1370  | 0.1677 | 126              | 35    | 43   |
| ECI RGB v2         | D50                  | 0.5343             | 0.0000  | 0.1676 | 136              | 0     | 43   |
| Ekta Space PS5 RGB | D50                  | 0.5130             | 0.1300  | 0.1723 | 131              | 33    | 44   |
| NTSC RGB           | C                    | 0.4853             | -0.0470 | 0.1752 | 124              | -12   | 45   |
| PAL/SECAM RGB      | D65                  | 0.5595             | -0.0756 | 0.1614 | 143              | -19   | 41   |
| ProPhoto RGB       | D50                  | 0.3769             | 0.1322  | 0.1150 | 96               | 34    | 29   |
| SMPTE-C RGB        | D65                  | 0.5873             | -0.1207 | 0.1618 | 150              | -31   | 41   |
| sRGB               | D65                  | 0.5759             | -0.0440 | 0.1421 | 147              | -11   | 36   |
| Wide Gamut RGB     | D50                  | 0.4705             | 0.1906  | 0.1690 | 120              | 49    | 43   |

| Density  | Red   | Green | Blue  | Visual |
|----------|-------|-------|-------|--------|
| Status A | 0.390 | 1.693 | 1.693 | -      |
| Status E | 0.837 | 1.693 | 1.695 | -      |
| Status M | 0.111 | 1.695 | 1.691 | -      |
| Status T | 0.837 | 1.693 | 1.690 | -      |

|        |   |   |   |       |
|--------|---|---|---|-------|
| Visual | - | - | - | 1.013 |
| Type 1 | - | - | - | 1.708 |
| Type 2 | - | - | - | 1.701 |

Continued ESI. Table S4.

|           |            | Ru(LH6) |        |        |        |        |       |       |      |       |       |       |           |       |        |
|-----------|------------|---------|--------|--------|--------|--------|-------|-------|------|-------|-------|-------|-----------|-------|--------|
| Observer  | Illuminant | X       | Y      | Z      | x      | y      | L     | a     | b    | C(ab) | H(ab) | u     | v         | C(uv) | H(uv)  |
| 2-Degree  | A          | 0.0656  | 0.0414 | 0.0101 | 0.5598 | 0.3539 | 24.14 | 22.37 | 8.19 | 23.82 | 20.12 | 34.37 | -<br>1.40 | 34.40 | 357.67 |
|           | B          | 0.0489  | 0.0365 | 0.0241 | 0.4467 | 0.3330 | 22.47 | 17.61 | 5.39 | 18.41 | 17.03 | 23.11 | 1.74      | 23.17 | 4.30   |
|           | C          | 0.0447  | 0.0351 | 0.0334 | 0.3952 | 0.3097 | 21.96 | 14.99 | 4.55 | 15.67 | 16.87 | 18.79 | 2.71      | 18.98 | 8.20   |
|           | D          | 0.0469  | 0.0360 | 0.0234 | 0.4413 | 0.3389 | 22.31 | 17.39 | 5.08 | 18.12 | 16.28 | 22.12 | 1.48      | 22.17 | 3.82   |
|           | E          | 0.0481  | 0.0361 | 0.0282 | 0.4279 | 0.3212 | 22.33 | 16.58 | 5.22 | 17.38 | 17.49 | 21.72 | 2.39      | 21.85 | 6.28   |
|           | F2         | 0.0329  | 0.0306 | 0.0187 | 0.4008 | 0.3718 | 20.27 | 4.40  | 1.99 | 4.83  | 24.40 | 5.39  | 0.74      | 5.44  | 7.86   |
|           | F7         | 0.0385  | 0.0331 | 0.0303 | 0.3777 | 0.3245 | 21.23 | 11.22 | 3.53 | 11.76 | 17.48 | 13.32 | 2.02      | 13.47 | 8.64   |
|           | F11        | 0.0322  | 0.0301 | 0.0179 | 0.4017 | 0.3755 | 20.09 | 3.02  | 1.67 | 3.46  | 28.97 | 3.81  | 0.67      | 3.87  | 10.00  |
|           | Blackbody  | 0.0470  | 0.0359 | 0.0244 | 0.4383 | 0.3346 | 22.26 | 16.66 | 5.06 | 17.41 | 16.89 | 21.47 | 1.70      | 21.54 | 4.53   |
|           | Custom     | 0.0481  | 0.0361 | 0.0282 | 0.4279 | 0.3212 | 22.33 | 16.58 | 5.22 | 17.38 | 17.49 | 21.72 | 2.39      | 21.85 | 6.28   |
| 10-Degree | A          | 0.0613  | 0.0405 | 0.0100 | 0.5485 | 0.3622 | 23.82 | 18.65 | 7.71 | 20.18 | 22.46 | 28.53 | -<br>0.81 | 28.54 | 358.38 |
|           | B          | 0.0457  | 0.0357 | 0.0238 | 0.4345 | 0.3394 | 22.20 | 14.62 | 4.98 | 15.44 | 18.83 | 19.03 | 1.87      | 19.13 | 5.61   |
|           | C          | 0.0417  | 0.0343 | 0.0327 | 0.3832 | 0.3159 | 21.70 | 12.41 | 4.16 | 13.08 | 18.54 | 15.36 | 2.65      | 15.59 | 9.78   |
|           | D          | 0.0440  | 0.0353 | 0.0230 | 0.4300 | 0.3452 | 22.05 | 14.42 | 4.70 | 15.16 | 18.06 | 18.22 | 1.62      | 18.29 | 5.07   |
|           | E          | 0.0449  | 0.0353 | 0.0281 | 0.4145 | 0.3261 | 22.05 | 13.67 | 4.82 | 14.50 | 19.42 | 17.79 | 2.49      | 17.96 | 7.97   |
|           | F2         | 0.0336  | 0.0304 | 0.0191 | 0.4041 | 0.3663 | 20.22 | 3.46  | 1.98 | 3.99  | 29.73 | 4.51  | 0.87      | 4.59  | 10.97  |
|           | F7         | 0.0370  | 0.0326 | 0.0300 | 0.3713 | 0.3279 | 21.07 | 9.17  | 3.32 | 9.75  | 19.91 | 11.00 | 2.06      | 11.20 | 10.62  |
|           | F11        | 0.0326  | 0.0300 | 0.0182 | 0.4038 | 0.3714 | 20.05 | 2.39  | 1.65 | 2.91  | 34.65 | 3.19  | 0.76      | 3.27  | 13.39  |
|           | Blackbody  | 0.0441  | 0.0352 | 0.0242 | 0.4265 | 0.3399 | 22.00 | 13.75 | 4.69 | 14.52 | 18.84 | 17.64 | 1.86      | 17.74 | 6.01   |
|           | Custom     | 0.0449  | 0.0353 | 0.0281 | 0.4145 | 0.3261 | 22.05 | 13.67 | 4.82 | 14.50 | 19.42 | 17.79 | 2.49      | 17.96 | 7.97   |

| Working Space      | Reference Illuminant | Range = [0.0, 1.0] |        |        | Range = [0, 255] |       |      |
|--------------------|----------------------|--------------------|--------|--------|------------------|-------|------|
|                    |                      | Red                | Green  | Blue   | Red              | Green | Blue |
| Adobe RGB (1998)   | D65                  | 0.2722             | 0.1864 | 0.1959 | 69               | 48    | 50   |
| Apple RGB          | D65                  | 0.2227             | 0.1251 | 0.1369 | 57               | 32    | 35   |
| Best RGB           | D50                  | 0.2762             | 0.2008 | 0.1978 | 70               | 51    | 50   |
| Beta RGB           | D50                  | 0.2741             | 0.1915 | 0.1982 | 70               | 49    | 51   |
| Bruce RGB          | D65                  | 0.2880             | 0.1864 | 0.1959 | 73               | 48    | 50   |
| CIE RGB            | E                    | 0.2951             | 0.2007 | 0.1974 | 75               | 51    | 50   |
| ColorMatch RGB     | D50                  | 0.2295             | 0.1211 | 0.1365 | 59               | 31    | 35   |
| Don RGB 4          | D50                  | 0.2764             | 0.1939 | 0.1975 | 70               | 49    | 50   |
| ECI RGB v2         | D50                  | 0.2927             | 0.1770 | 0.1949 | 75               | 45    | 50   |
| Ekta Space PS5 RGB | D50                  | 0.2825             | 0.1932 | 0.1981 | 72               | 49    | 51   |
| NTSC RGB           | C                    | 0.2722             | 0.1873 | 0.1983 | 69               | 48    | 51   |
| PAL/SECAM RGB      | D65                  | 0.2948             | 0.1864 | 0.1964 | 75               | 48    | 50   |
| ProPhoto RGB       | D50                  | 0.1950             | 0.1406 | 0.1380 | 50               | 36    | 35   |
| SMPTE-C RGB        | D65                  | 0.3042             | 0.1832 | 0.1965 | 78               | 47    | 50   |
| sRGB               | D65                  | 0.2934             | 0.1712 | 0.1822 | 75               | 44    | 46   |
| Wide Gamut RGB     | D50                  | 0.2688             | 0.2007 | 0.1976 | 69               | 51    | 50   |

| Density  | Red   | Green | Blue  | Visual |
|----------|-------|-------|-------|--------|
| Status A | 1.197 | 1.537 | 1.546 | -      |
| Status E | 1.445 | 1.537 | 1.555 | -      |

|          |       |       |       |       |
|----------|-------|-------|-------|-------|
| Status M | 0.723 | 1.538 | 1.546 | -     |
| Status T | 1.445 | 1.537 | 1.548 | -     |
| Visual   | -     | -     | -     | 1.382 |
| Type 1   | -     | -     | -     | 1.574 |
| Type 2   | -     | -     | -     | 1.564 |

Continued ESI. Table S4.

|                 |                   | <b>Ru(bpy)<sub>3</sub><sup>2+</sup></b> |          |          |          |          |          |          |          |              |              |          |          |              |              |
|-----------------|-------------------|-----------------------------------------|----------|----------|----------|----------|----------|----------|----------|--------------|--------------|----------|----------|--------------|--------------|
| <b>Observer</b> | <b>Illuminant</b> | <b>X</b>                                | <b>Y</b> | <b>Z</b> | <b>x</b> | <b>y</b> | <b>L</b> | <b>a</b> | <b>b</b> | <b>C(ab)</b> | <b>H(ab)</b> | <b>u</b> | <b>v</b> | <b>C(uv)</b> | <b>H(uv)</b> |
| 2-Degree        | A                 | 0.4688                                  | 0.3133   | 0.0668   | 0.5522   | 0.3691   | 62.79    | 36.85    | 21.31    | 42.57        | 30.04        | 76.16    | 0.75     | 76.16        | 0.56         |
|                 | B                 | 0.3697                                  | 0.2807   | 0.1591   | 0.4567   | 0.3467   | 59.95    | 32.56    | 16.68    | 36.59        | 27.13        | 61.35    | 11.18    | 62.36        | 10.33        |
|                 | C                 | 0.3424                                  | 0.2700   | 0.2199   | 0.4114   | 0.3244   | 58.97    | 28.90    | 15.11    | 32.61        | 27.60        | 53.81    | 15.42    | 55.98        | 15.99        |
|                 | D                 | 0.3580                                  | 0.2778   | 0.1541   | 0.4532   | 0.3517   | 59.69    | 33.10    | 16.15    | 36.83        | 26.01        | 60.45    | 10.24    | 61.31        | 9.61         |
|                 | E                 | 0.3654                                  | 0.2782   | 0.1855   | 0.4407   | 0.3355   | 59.72    | 31.05    | 16.51    | 35.16        | 28.00        | 59.27    | 13.80    | 60.86        | 13.10        |
|                 | F2                | 0.3116                                  | 0.2618   | 0.1237   | 0.4470   | 0.3756   | 58.21    | 20.03    | 14.29    | 24.60        | 35.52        | 37.92    | 8.73     | 38.91        | 12.96        |
|                 | F7                | 0.3177                                  | 0.2631   | 0.2005   | 0.4066   | 0.3367   | 58.33    | 26.62    | 14.32    | 30.22        | 28.28        | 48.00    | 13.81    | 49.94        | 16.05        |
|                 | F11               | 0.3544                                  | 0.2783   | 0.1182   | 0.4720   | 0.3706   | 59.74    | 26.27    | 16.91    | 31.24        | 32.76        | 50.64    | 8.73     | 51.38        | 9.78         |
|                 | Blackbody         | 0.3618                                  | 0.2783   | 0.1604   | 0.4519   | 0.3477   | 59.74    | 32.05    | 16.42    | 36.02        | 27.13        | 59.78    | 11.28    | 60.84        | 10.68        |
|                 | Custom            | 0.3654                                  | 0.2782   | 0.1855   | 0.4407   | 0.3355   | 59.72    | 31.05    | 16.51    | 35.16        | 28.00        | 59.27    | 13.80    | 60.86        | 13.10        |
| 10-Degree       | A                 | 0.4553                                  | 0.3101   | 0.0658   | 0.5477   | 0.3731   | 62.52    | 32.89    | 21.06    | 39.06        | 32.63        | 68.55    | 1.59     | 68.57        | 1.33         |
|                 | B                 | 0.3549                                  | 0.2758   | 0.1565   | 0.4508   | 0.3504   | 59.51    | 29.48    | 16.12    | 33.60        | 28.67        | 55.61    | 11.15    | 56.71        | 11.34        |
|                 | C                 | 0.3260                                  | 0.2645   | 0.2149   | 0.4048   | 0.3284   | 58.46    | 26.35    | 14.41    | 30.03        | 28.67        | 48.70    | 14.81    | 50.90        | 16.91        |
|                 | D                 | 0.3443                                  | 0.2732   | 0.1513   | 0.4478   | 0.3553   | 59.27    | 29.93    | 15.61    | 33.76        | 27.55        | 54.81    | 10.22    | 55.75        | 10.56        |
|                 | E                 | 0.3500                                  | 0.2730   | 0.1844   | 0.4335   | 0.3381   | 59.25    | 28.03    | 15.90    | 32.22        | 29.57        | 53.61    | 13.77    | 55.35        | 14.41        |
|                 | F2                | 0.3158                                  | 0.2600   | 0.1261   | 0.4499   | 0.3704   | 58.03    | 17.73    | 14.17    | 22.69        | 38.63        | 35.29    | 9.21     | 36.47        | 14.63        |
|                 | F7                | 0.3085                                  | 0.2589   | 0.1977   | 0.4031   | 0.3384   | 57.94    | 24.02    | 13.80    | 27.70        | 29.88        | 43.78    | 13.50    | 45.82        | 17.14        |
|                 | F11               | 0.3548                                  | 0.2768   | 0.1200   | 0.4720   | 0.3683   | 59.60    | 23.64    | 16.82    | 29.02        | 35.43        | 47.14    | 9.37     | 48.06        | 11.24        |
|                 | Blackbody         | 0.3483                                  | 0.2737   | 0.1589   | 0.4461   | 0.3504   | 59.31    | 28.92    | 15.89    | 32.99        | 28.79        | 54.19    | 11.36    | 55.37        | 11.84        |
|                 | Custom            | 0.3500                                  | 0.2730   | 0.1844   | 0.4335   | 0.3381   | 59.25    | 28.03    | 15.90    | 32.22        | 29.57        | 53.61    | 13.77    | 55.35        | 14.41        |

| <b>Working Space</b> | <b>Reference Illuminant</b> | <b>Range = [0.0, 1.0]</b> |              |             | <b>Range = [0, 255]</b> |              |             |
|----------------------|-----------------------------|---------------------------|--------------|-------------|-------------------------|--------------|-------------|
|                      |                             | <b>Red</b>                | <b>Green</b> | <b>Blue</b> | <b>Red</b>              | <b>Green</b> | <b>Blue</b> |
| Adobe RGB (1998)     | D65                         | 0.7002                    | 0.4695       | 0.4570      | 179                     | 120          | 117         |
| Apple RGB            | D65                         | 0.7089                    | 0.3868       | 0.3826      | 181                     | 99           | 98          |
| Best RGB             | D50                         | 0.6991                    | 0.5098       | 0.4659      | 178                     | 130          | 119         |
| Beta RGB             | D50                         | 0.6936                    | 0.4866       | 0.4654      | 177                     | 124          | 119         |
| Bruce RGB            | D65                         | 0.7422                    | 0.4695       | 0.4570      | 189                     | 120          | 117         |
| CIE RGB              | E                           | 0.7483                    | 0.5078       | 0.4645      | 191                     | 129          | 118         |
| ColorMatch RGB       | D50                         | 0.7140                    | 0.3814       | 0.3807      | 182                     | 97           | 97          |
| Don RGB 4            | D50                         | 0.6994                    | 0.4924       | 0.4644      | 178                     | 126          | 118         |
| ECI RGB v2           | D50                         | 0.7346                    | 0.5109       | 0.5024      | 187                     | 130          | 128         |
| Ekta Space PS5 RGB   | D50                         | 0.7141                    | 0.4896       | 0.4651      | 182                     | 125          | 119         |
| NTSC RGB             | C                           | 0.6934                    | 0.4771       | 0.4651      | 177                     | 122          | 119         |
| PAL/SECAM RGB        | D65                         | 0.7602                    | 0.4695       | 0.4563      | 194                     | 120          | 116         |
| ProPhoto RGB         | D50                         | 0.6035                    | 0.4390       | 0.3937      | 154                     | 112          | 100         |
| SMPTE-C RGB          | D65                         | 0.7852                    | 0.4614       | 0.4572      | 200                     | 118          | 117         |
| sRGB                 | D65                         | 0.7753                    | 0.4725       | 0.4591      | 198                     | 120          | 117         |
| Wide Gamut RGB       | D50                         | 0.6815                    | 0.5083       | 0.4635      | 174                     | 130          | 118         |

| Density  | Red   | Green | Blue  | Visual |
|----------|-------|-------|-------|--------|
| Status A | 0.199 | 0.693 | 0.736 | -      |
| Status E | 0.353 | 0.693 | 0.740 | -      |
| Status M | 0.070 | 0.684 | 0.728 | -      |
| Status T | 0.353 | 0.693 | 0.729 | -      |
| Visual   | -     | -     | -     | 0.504  |
| Type 1   | -     | -     | -     | 0.766  |
| Type 2   | -     | -     | -     | 0.781  |

**ESI. Table S5.** The molecular structures and EL properties of near infrared light electrochemical cell based on ruthenium polypyridyl complexes

| Complexes                                                                           | Cell configuration                     | EL <sub>max</sub> (nm) | $\eta_{\text{ext}}$ (%) | Ref. |
|-------------------------------------------------------------------------------------|----------------------------------------|------------------------|-------------------------|------|
|    | ITO/complex<br>(100 nm)/Au<br>(100 nm) | 630                    | 0.31                    | (18) |
|   | ITO/complex<br>(100 nm)/Au<br>(100 nm) | 780                    | 0.013                   | (18) |
|  | ITO/complex<br>(100 nm)/Au<br>(100 nm) | 880                    | 0.075                   | (18) |

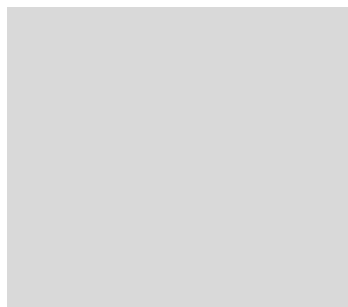

ITO/complex  
(100 nm)/Au  
(100 nm) 900 0.06 (18)

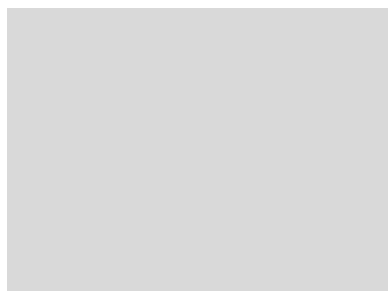

ITO/complex  
(100 nm)/Au  
(100 nm) 945 0.03 (18)

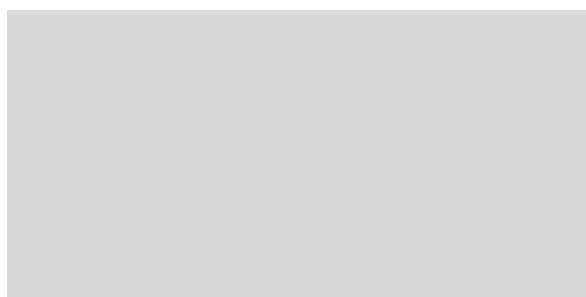

ITO/complex  
(100 nm)/Au  
(100 nm) 1040 - (18)

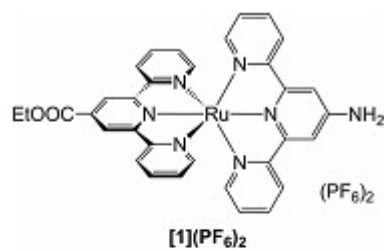

ITO/PEDOT:  
PSS(45nm)/Ru:  
PMMA  
(169-194  
nm)/Ag 733 0.001 (19)

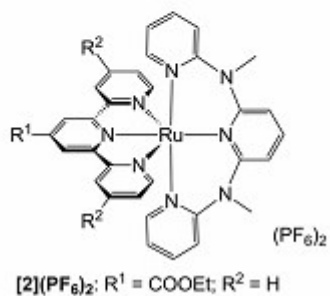

ITO/PEDOT:  
PSS(45nm)/Ru:  
PMMA  
(169-194  
nm)/Ag 722 0.028 (19)

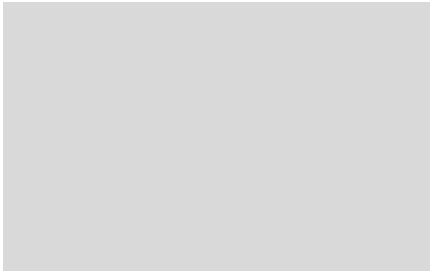

ITO/PEDOT:  
PSS(45nm)/R  
u:PMMA  
(169-194  
nm)/Ag

|     |       |      |
|-----|-------|------|
| 745 | 0.013 | (19) |
|-----|-------|------|

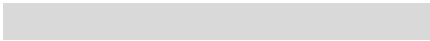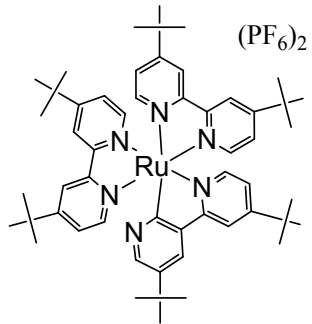

ITO/PEDOT:  
PSS(30nm)/R  
u/Ag

|          |                                 |      |
|----------|---------------------------------|------|
| 600, 720 | 2.06<br>,0.27(after 100<br>min) | (20) |
|----------|---------------------------------|------|

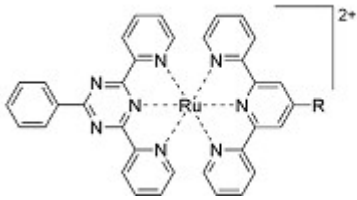

1: R=H

TO/PEDOT:P  
SS/  
complex:PM  
MA/Al

|     |       |      |
|-----|-------|------|
| 717 | 0.005 | (21) |
|-----|-------|------|

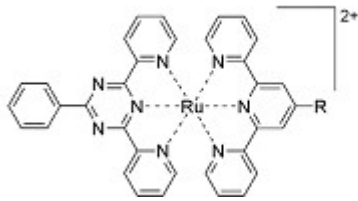

2: R= CO<sub>2</sub>Et

TO/PEDOT:P  
SS/  
complex:PM  
MA/Al

|     |       |      |
|-----|-------|------|
| 725 | 0.005 | (21) |
|-----|-------|------|

## References:

1. P. B. Sullivan, D. J. Salmon, T. Meyer, *Inorg. Chem.* 1978, 17, 3334.
2. K. Suzuki, A. Kobayashi, S. Kaneko, K. Takehira, T. Yoshihara, H. Ishida, K. Shiina, S. Oishi, S. Tobita, *Phys. Chem. Chem. Phys.*, 2009, 11, 9850.
3. A. Juris, V. Balzani, F. Barigelletti, S. Campagna, P. I. Belser and A. J. C. C. R. Von Zelewsky, *Coord. Chem.*, 1988, 84, 85.
4. C. A. Goss and H. D. J. I. C. Abruna, *Inorg. Chem.*, 1985, 24, 4263.
5. L. Warren and M. J. I. C. Bennett, *Inorg. Chem.*, 1976, 15, 3126.
6. P. Belser, A. Vonzelewsky, A. Juris, F. Barigelletti and V. J. G. C. I. Balzani, *Chim. Ital.*, 1985, 115, 723.
7. A. Juris, S. Campagna, V. Balzani, G. Gremaud and A. J. I. c. Von Zelewsky, *Inorg. Chem.*, 1988, 27, 3652.
8. N. E. Katz, C. Creutz and N. J. I. C. Sutin, *Inorg. Chem.*, 1988, 27, 1687.
9. R. Crutchley and A. J. I. C. Lever, *Inorg. Chem.*, 1982, 21, 2276.
10. R. Crutchley, A. Lever and A. J. I. C. Poggi, *Inorg. Chem.*, 1983, 22, 2647.
11. T. Matsumura-Inoue, I. Ikemoto, Y. J. J. o. e. c. Umezawa and i. electrochemistry, *J. Electroanal. Chem. Interfacial Electrochem.*, 1986, 209, 135.
12. H. F. Suen, S. Wilson, M. Pomerantz and J. L. J. I. C. Walsh, *Inorg. Chem. Acta*, 1989, 28, 786.
13. M. Gal, C. Marzin, G. Tarrago, I. Zidane, T. Hours, D. Lerner, C. Andrieux, H. Gampp and J. J. I. C. Saveant, *Inorg. Chem.*, 1986, 25, 1775.
14. S. A. Kubow, M. E. Marmion and K. J. J. I. C. Takeuchi, *Inorg. Chem.*, 1988, 27, 2761.
15. A. Giraudeau, P. Lemoine, M. Gross, J. Rosé and P. Braunstein, *Inorg Chim Acta*, 1982, 62, 117.
16. D. P. Riley and J. D. J. I. C. Oliver, *Inorg. Chem.*, 1986, 25, 1814.
17. W. R. Murphy Jr, K. J. Brewer, G. Gettliffe and J. D. J. I. C. Petersen, *Inorg. Chem.*, 1989, 28, 81.
18. S. Xun, J. Zhang, X. Li, D. Ma and Z. Y. J. S. M. Wang, *Syn. Met.*, 2008, 158, 484.
19. A. Breivogel, M. Park, D. Lee, S. Klassen, A. Kühnle, C. Lee, K. Char and K. J. E. J. o. I. C. Heinze, *Inorg. Chem.*, 2014, 2014, 288.
20. J.-H. Hsu and H.-C. J. P. C. C. P. Su, *Phys. Chem. Chem. Phys.*, 2016, 18, 5034.
21. H. J. Bolink, E. Coronado, R. D. Costa, P. Gaviña, E. Ortí and S. J. I. c. Tatay, *Inorg. Chem.*, 2009, 48, 3907.
